# Supplementary material for: Zn-Doped Cu(100) facet with efficient catalytic ability for the CO2 electroreduction to ethylene
Source: Royal Society of Chemistry journal article supplement (doi:10.1039/c9cp03692j), 2019-01-01
Supplement: c9cp03692j1.pdf [file c9cp03692j1.pdf]

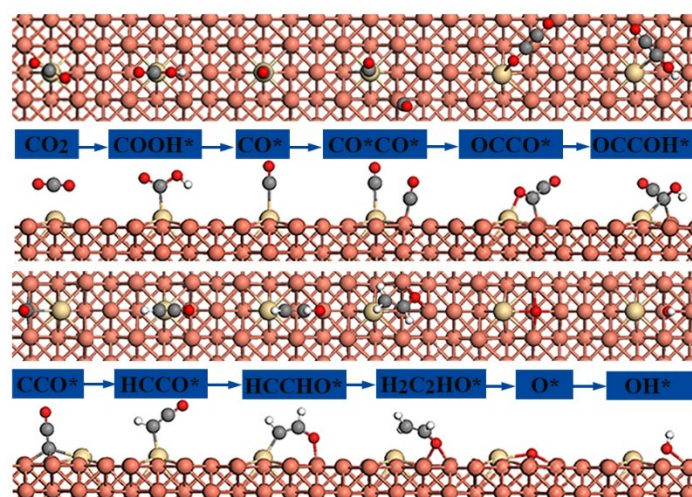

**Figure S1.** Model of optimized intermediates of carbon dioxide reduction to ethylene on Cd-Cu(100). Orange, yellow, gray, red and white balls represent Cu, Cd, C, O, H atoms, respectively.

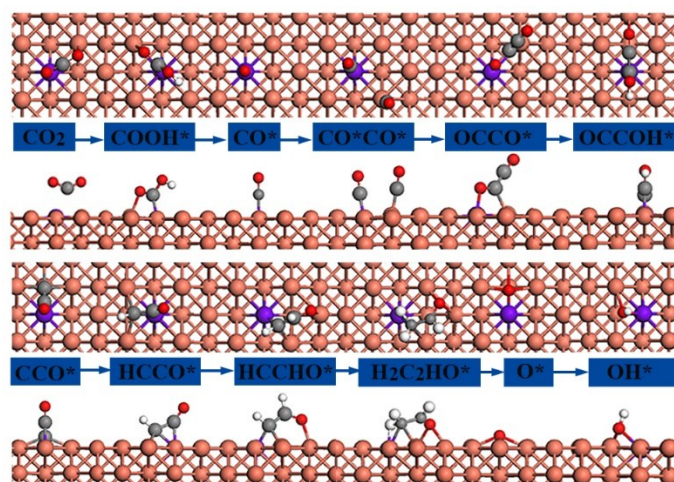

**Figure S2.** Model of optimized intermediates of carbon dioxide reduction to ethylene on Co-Cu(100). Orange, purple, gray, red and white balls represent Cu, Co, C, O, H atoms, respectively.

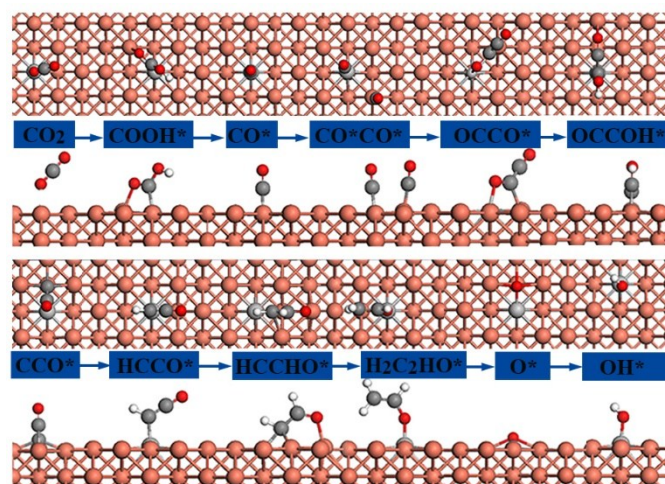

**Figure S3.** Model of optimized intermediates of carbon dioxide reduction to ethylene on Fe-Cu(100). Orange, silver, gray, red and white balls represent Cu, Fe, C, O, H atoms, respectively.

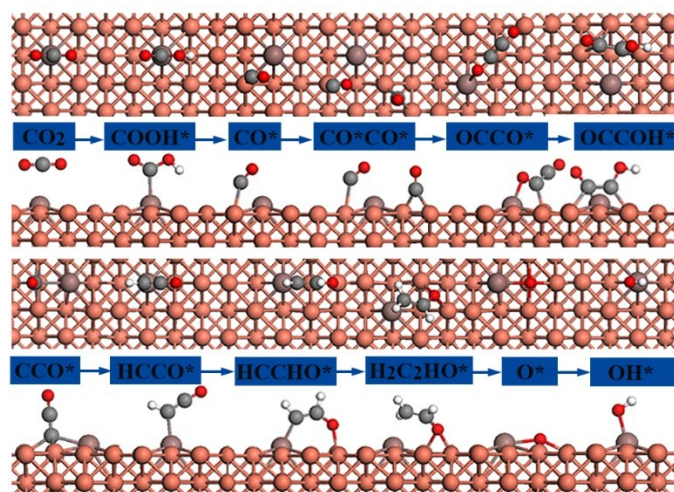

**Figure S4.** Model of optimized intermediates of carbon dioxide reduction to ethylene on In-Cu(100). Orange, brown, gray, red and white balls represent Cu, In, C, O, H atoms, respectively.

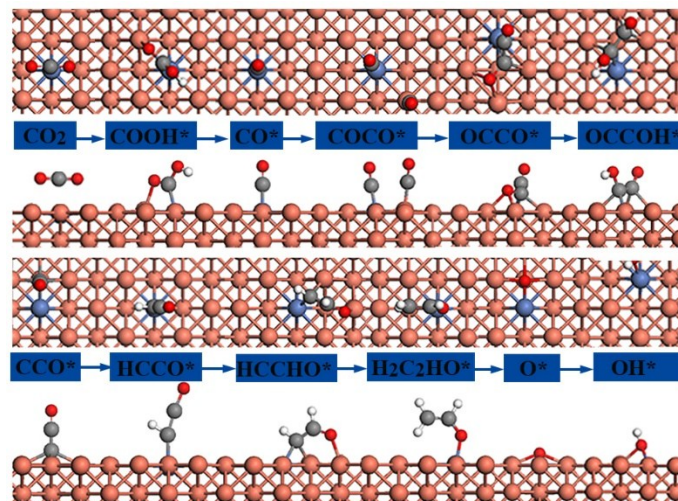

**Figure S5.** Model of optimized intermediates of carbon dioxide reduction to ethylene on Ni-Cu(100). Orange, blue, gray, red and white balls represent Cu, Ni, C, O, H atoms, respectively.

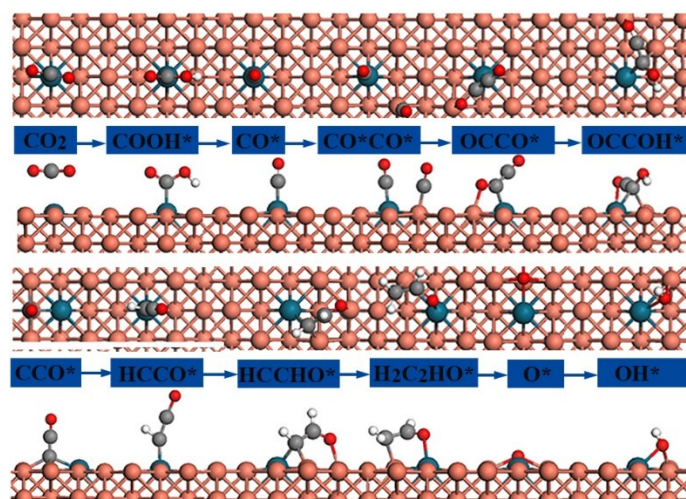

**Figure S6.** Model of optimized intermediates of carbon dioxide reduction to ethylene on Pd-Cu(100). Orange, blue-green, gray, red and white balls represent Cu, Pd, C, O, H atoms, respectively.

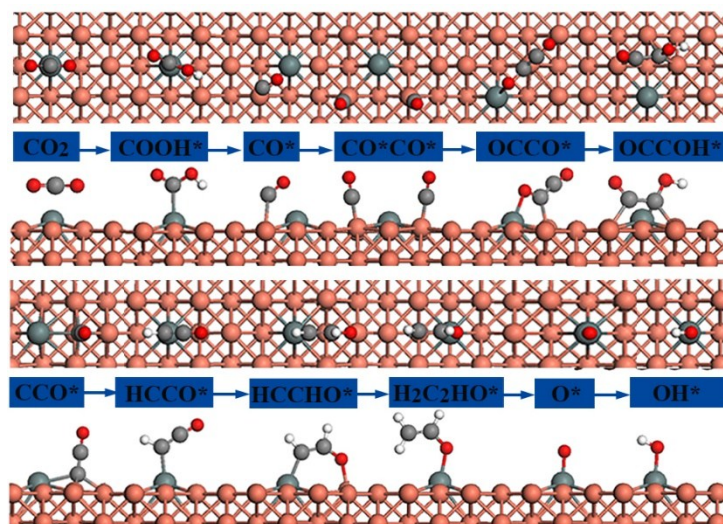

**Figure S7.** Model of optimized intermediates of carbon dioxide reduction to ethylene on Sn-Cu(100). Orange, cyan, gray, red and white balls represent Cu, Sn, C, O, H atoms, respectively.
